# Supplementary material for: Kinetic and structural comparison of a protein’s cotranslational folding and refolding pathways
Source: PubMed Central journal article supplement — Sci Adv. 2018 May 30;4(5):eaas9098. doi: 10.1126/sciadv.aas9098 (PMC5976279; doi:10.1126/sciadv.aas9098), 2018-05-30
Supplement: aas9098_SM.pdf [file aas9098_SM.pdf]

## Supplementary Materials for **Kinetic and structural comparison of a protein's cotranslational folding and refolding pathways**

Avi J. Samelson, Eric Bolin, Shawn M. Costello, Ajeet K. Sharma, Edward P. O'Brien, Susan Marqusee

Published 30 May 2018, *Sci. Adv.* **4**, eaas9098 (2018)

DOI: 10.1126/sciadv.aas9098

### **The PDF file includes:**

- fig. S1. Cotranslational folding of HaloTag can be measured using FP.
- fig. S2. Addition of the peptidyl-proline isomerase CypA does not affect HaloTag refolding or cotranslational folding rates.
- fig. S3. Aggregation of HaloTag.
- fig. S4. Cysteine accessibility of WT HaloTag.
- fig. S5. Characterization of Halo\* cysteine mutants.
- fig. S6. Gels for data shown in Fig. 4.
- fig. S7. Characterization of Halo\* E121C cysteine accessibility.
- table S1. Kinetic data obtained for HaloTag folding using FP.
- table S2. Determination of HaloTag folding efficiency under different conditions.
- table S3. Folding rates of HaloTag and variants measured by FP.
- Legend for table S4

### **Other Supplementary Material for this manuscript includes the following:**

(available at [advances.sciencemag.org/cgi/content/full/4/5/eaas9098/DC1](https://advances.sciencemag.org/cgi/content/full/4/5/eaas9098/DC1))

- table S4 (Microsoft Excel format). Normalized HX-MS data.

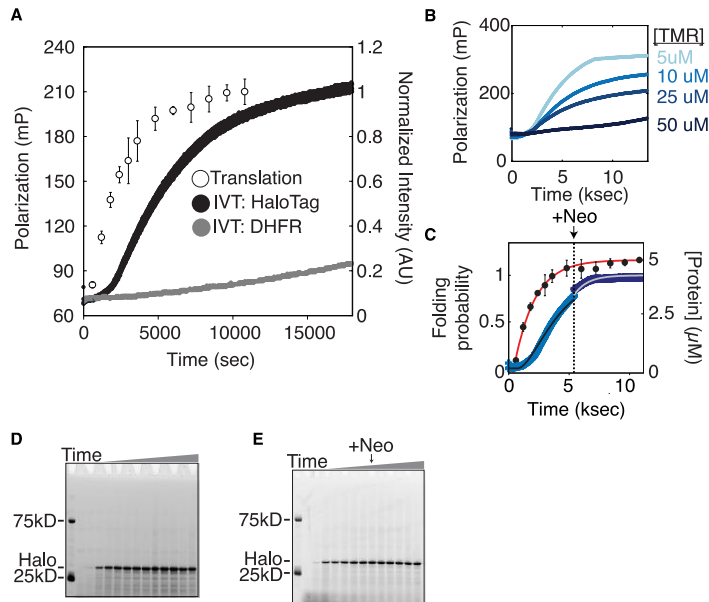

**fig. S1. Cotranslational folding of HaloTag can be measured using FP.** (A) Raw FP data (left axis) for IVT reactions initiated with HaloTag (black) and DHFR (gray) plasmids. Translation (right axis) of HaloTag as determined by gel. (B) Polarization as a function of TMR-ligand concentration during IVT of HaloTag. (C) Folding probability (left axis, blue lines) and HaloTag protein concentration (right axis, black dots with red line) as a function of time before and after the addition of neomycin. (D) and (E) Representative gels used to measure protein translation in figure S1A and figure S1C.

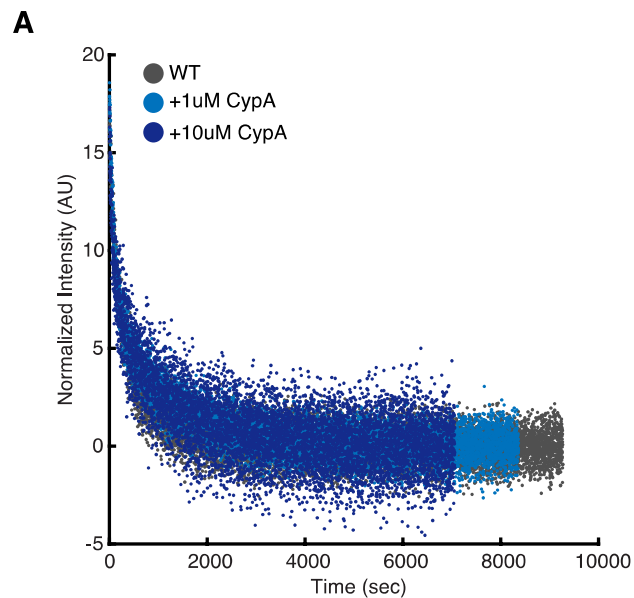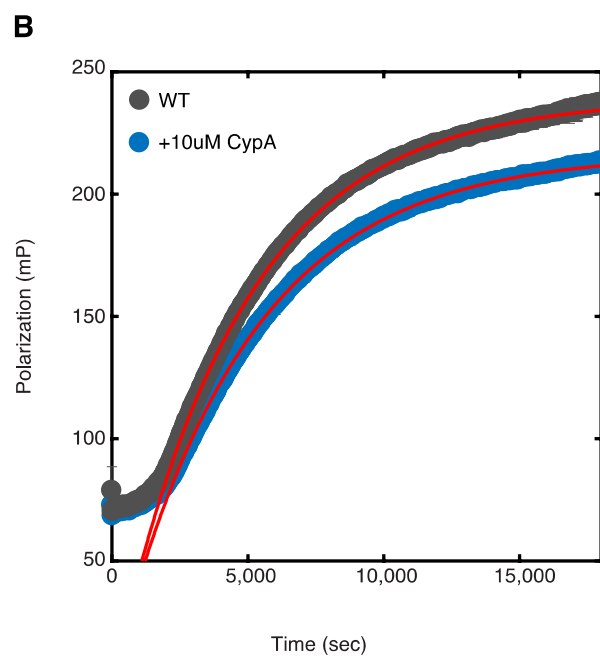

**fig. S2. Addition of the peptidyl-proline isomerase CypA does not affect HaloTag refolding or cotranslational folding rates. (A)** Refolding of HaloTag in increasing concentrations of CypA as monitored by CD. **(B)** FP of HaloTag in the presence of 10 $\mu$ M CypA (blue) and no CypA (gray).

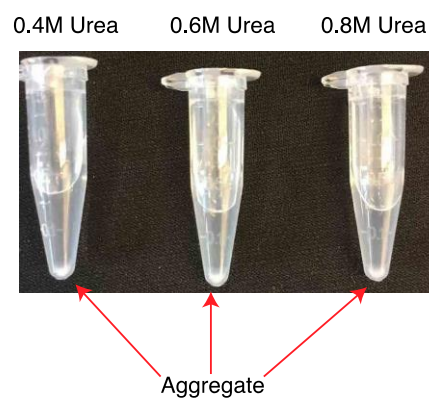

**fig. S3. Aggregation of HaloTag.** HaloTag aggregates after refolding via dilution from 8.0M urea to the indicated final concentrations of urea.

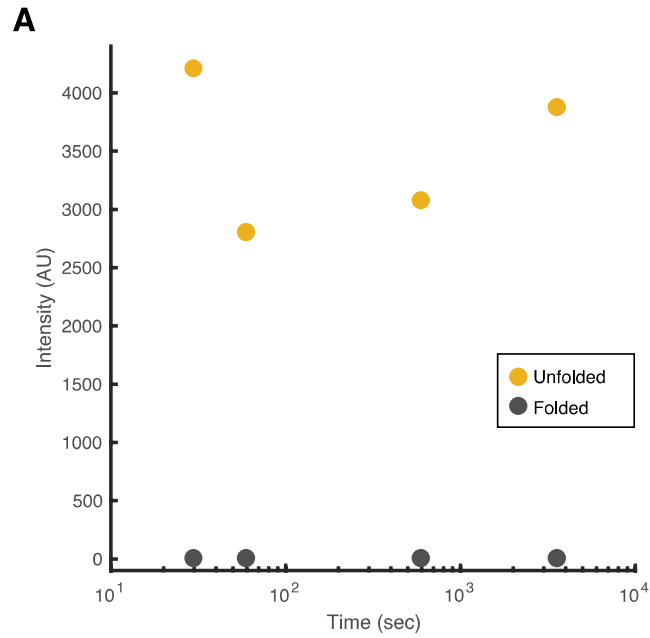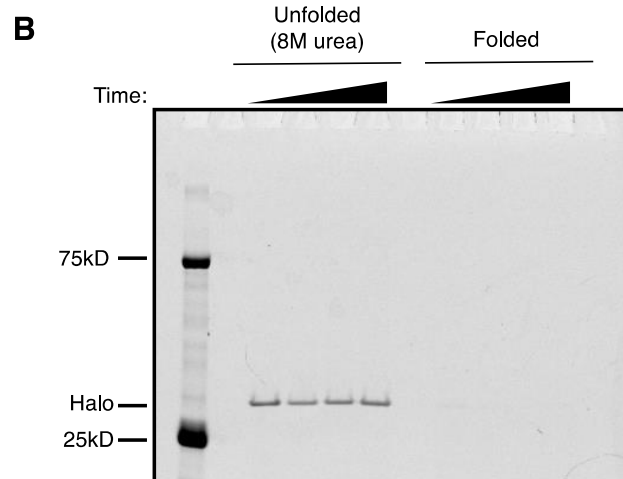

**fig. S4. Cysteine accessibility of WT HaloTag.** (A) Cysteine accessibility as a function of time as measured by fluorescein-maleimide fluorescence for unfolded (yellow circles) and folded (grey circles) HaloTag. (B) Raw data for plot in (A)

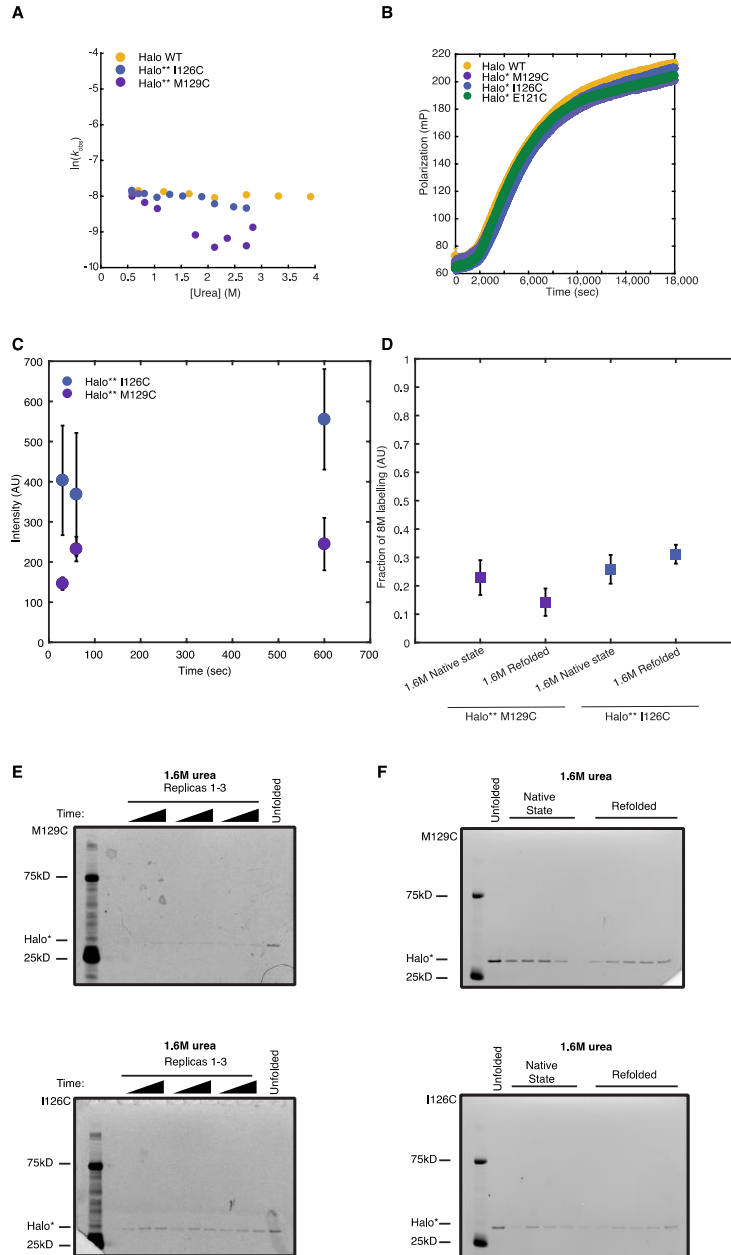

**fig. S5. Characterization of Halo\* cysteine mutants.** (A) Refolding rate as a function of [urea] as measured by FP for different HaloTag constructs. WT – yellow; Halo\* M129C – purple; Halo\* I126C – blue. (B) Cotranslational folding of HaloTag variants measure by FP. WT – yellow; Halo\* M129C – purple; Halo\* I126C – blue; Halo\*E121C – green. (C) Cysteine accessibility as a function of time at 1.6M urea for Halo variants. (D) Cysteine accessibility as a fraction of unfolded intensity for refolded and native state Halo variants at 1.6M urea. (E) And (F) Gels used for plots in (C) and (D) respectively

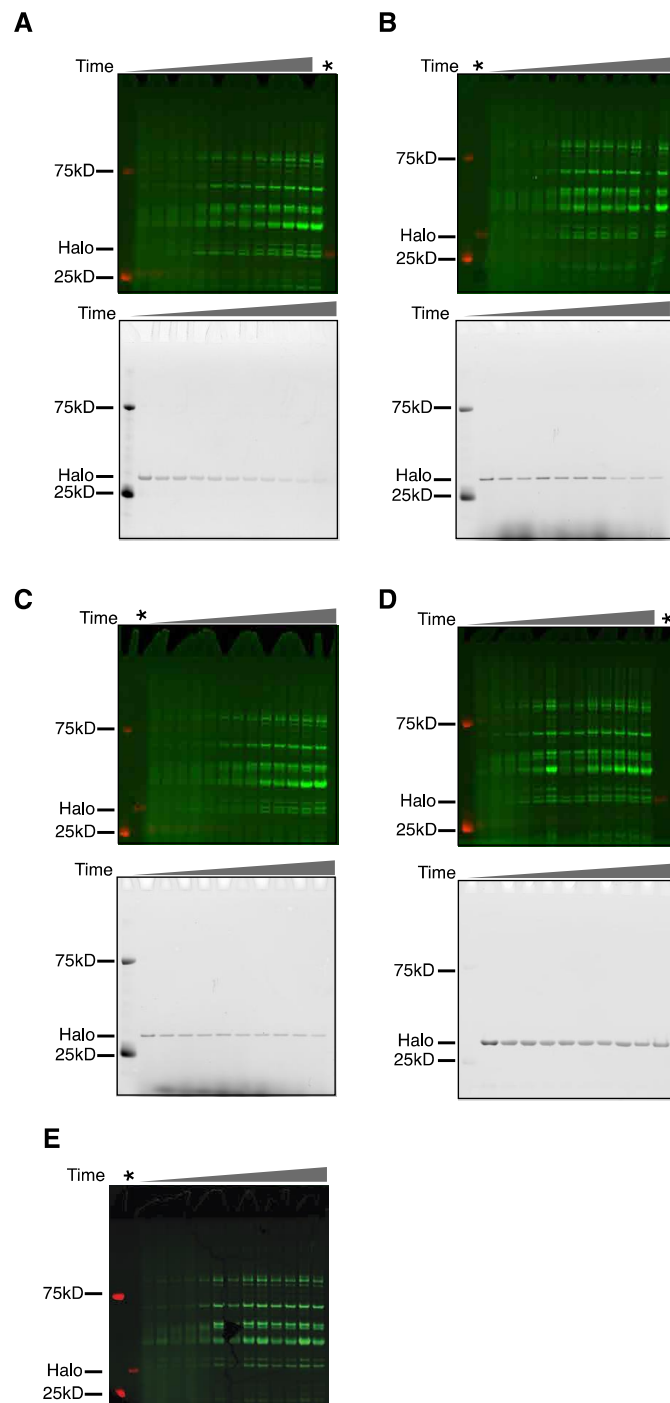

**fig. S6. Gels for data shown in Fig. 4.** For (A)-(D), gel in color is during translation and gel shown in black and white is during refolding. \* marks HaloTag bound to TMR-ligand for the purpose of finding the HaloTag band during analysis. (A) HaloTag WT. (B) Halo\* M129C. (C) Halo\* I126C. (D) Halo\* E121C. (E) No template added.

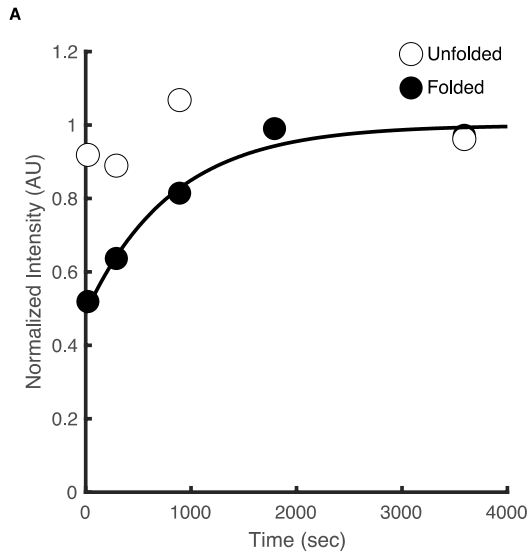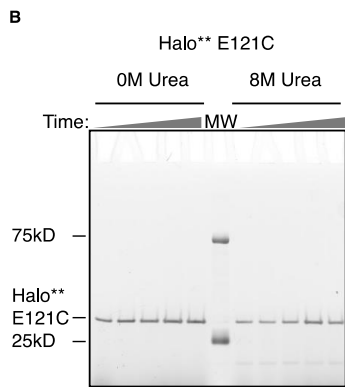

**fig. S7. Characterization of Halo\* E121C cysteine accessibility.** (A) Cysteine accessibility of folded (black circles) and unfolded (white circles) Halo\* E121C as measured by fluorescein-maleimide reactivity. (B) Gel used in (A)



**table S1. Kinetic data obtained for HaloTag folding using FP.**

|                                                  | Lag Time (sec)      | Rate ( $\times 10^{-4} \text{ sec}^{-1}$ ) |
|--------------------------------------------------|---------------------|--------------------------------------------|
| Refolding (polarization)                         | NA                  | 4.8 $\pm$ 0.6                              |
| Folding ( <i>in vitro</i> translation)           | 811.29 $\pm$ 8.57   | 4.42 $\pm$ 0.02                            |
| Translation                                      | 251.29 $\pm$ 34.6   | 4.50 $\pm$ 0.10                            |
| Folding <sub>before +neo</sub>                   | 724.18 $\pm$ 17.0   | 5.49 $\pm$ 0.07                            |
| Folding <sub>after +neo</sub>                    | NA                  | 9.13 $\pm$ 0.19                            |
| Folding <sub>[TMR] = 5<math>\mu</math>M</sub>    | 1065.89 $\pm$ 17.32 | 4.39 $\pm$ 0.04                            |
| Folding <sub>[TMR] = 10<math>\mu</math>M</sub>   | 811.29 $\pm$ 8.6    | 4.42 $\pm$ 0.02                            |
| Folding <sub>[TMR] = 12.5<math>\mu</math>M</sub> | 780.05 $\pm$ 8.9    | 6.13 $\pm$ 0.04                            |

**table S2. Determination of HaloTag folding efficiency under different conditions.**

|               | Fraction Folded | Number of samples |
|---------------|-----------------|-------------------|
| Native        | 1.04±0.01       | 3                 |
| Unfolded      | 0.0006±0.0003   | 3                 |
| 0.8M refolded | 0.73±0.10       | 15                |
| 0.8M dialysis | 0.74±0.11       | 15                |
| IVT refolded  | 0.69±0.06       | 15                |
| IVT native    | 0.91±0.03       | 15                |

**table S3. Folding rates of HaloTag and variants measured by FP.**

|                     | Rate ( $\times 10^{-4} \text{ sec}^{-1}$ ) | $t_0$ (sec)   |
|---------------------|--------------------------------------------|---------------|
| WT (10 $\mu$ M TMR) | 4.40 $\pm$ 0.02                            | 811.3 $\pm$ 9 |
| +10 $\mu$ M CypA    | 2.12 $\pm$ 0.02                            | 2007 $\pm$ 70 |
| Halo** I126C        | 2.08 $\pm$ 0.02                            | 612 $\pm$ 33  |
| Halo** M129C        | 2.20 $\pm$ 0.08                            | 848 $\pm$ 10  |
| Halo** E121C        | 2.32 $\pm$ 0.11                            | 755 $\pm$ 57  |

**table S4. Normalized HX-MS data.** Normalized HX/MS peptides used in Figure 4. Peptides in blue were excluded from analysis.
